# Supplementary material
Source: MDPI journal article supplement (https://www.mdpi.com/2073-4395/13/4/1150)
Supplement: s1 [file s1 › agronomy-2307726-supplementary.pdf]

## Supplementary Material

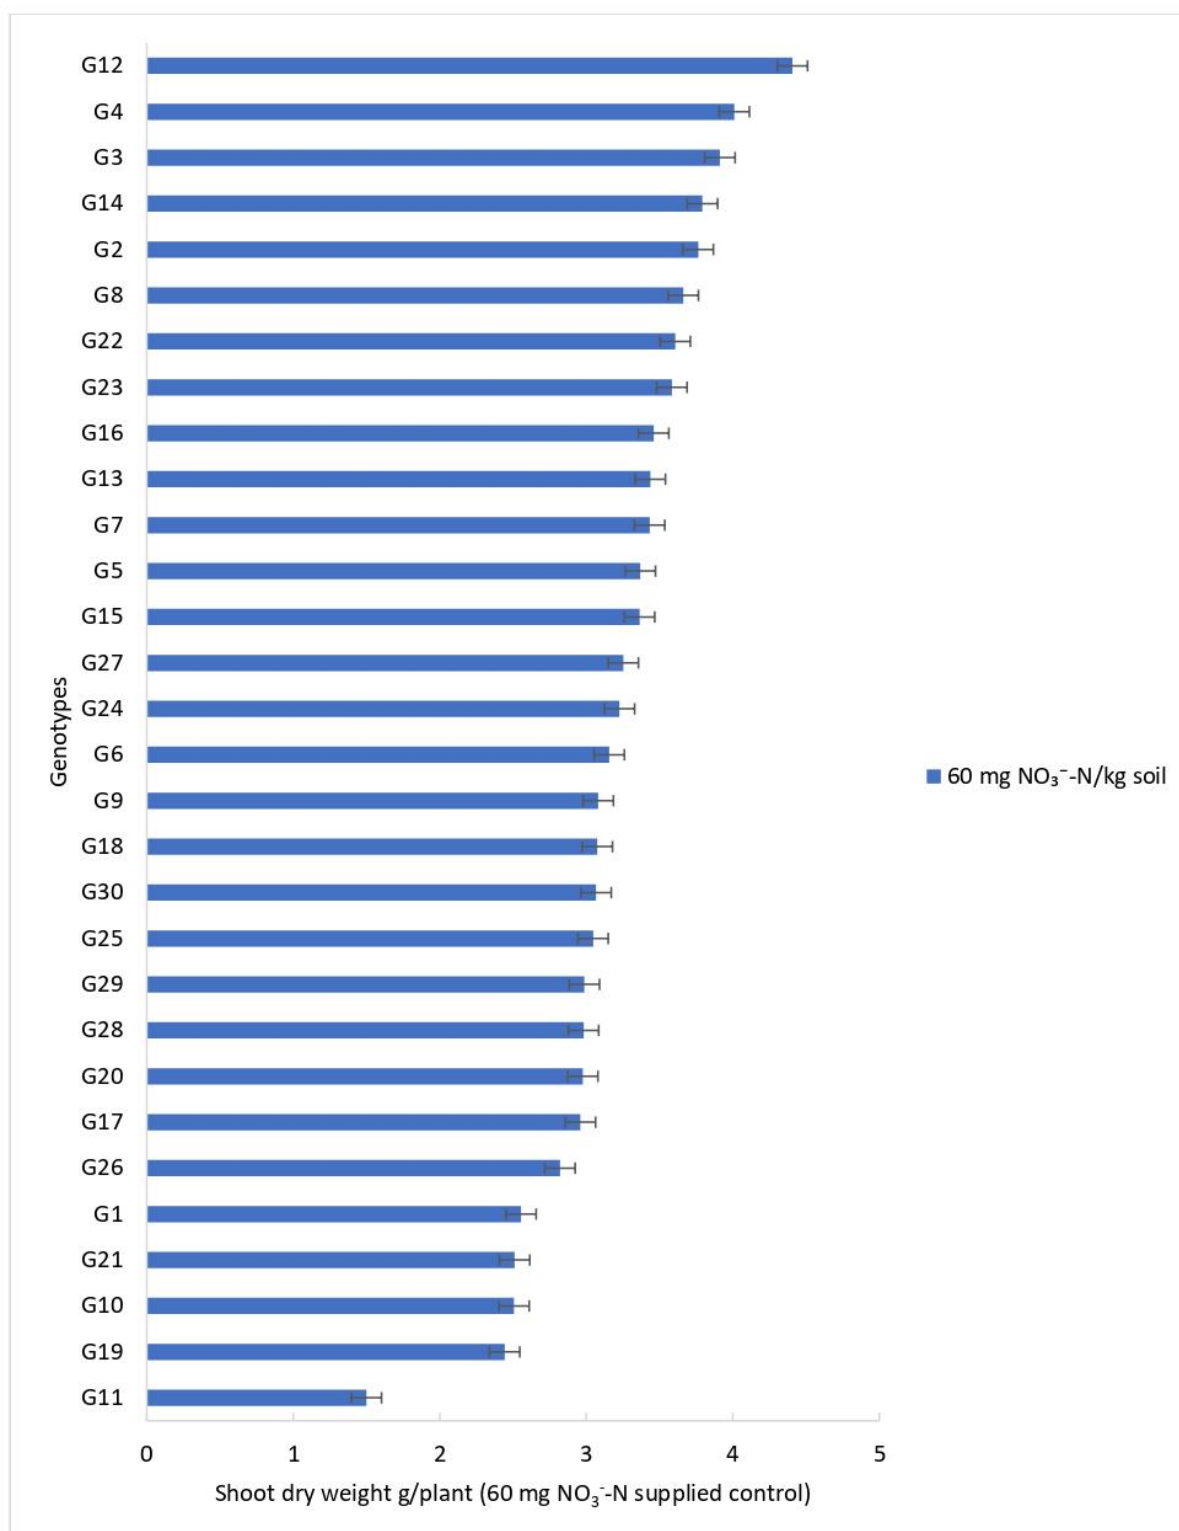

Figure S1. Effect of the control 60 mg NO<sub>3</sub>-N/kg soil on shoot dry weight of canola genotypes. Error bars represent ±SE (n=3).

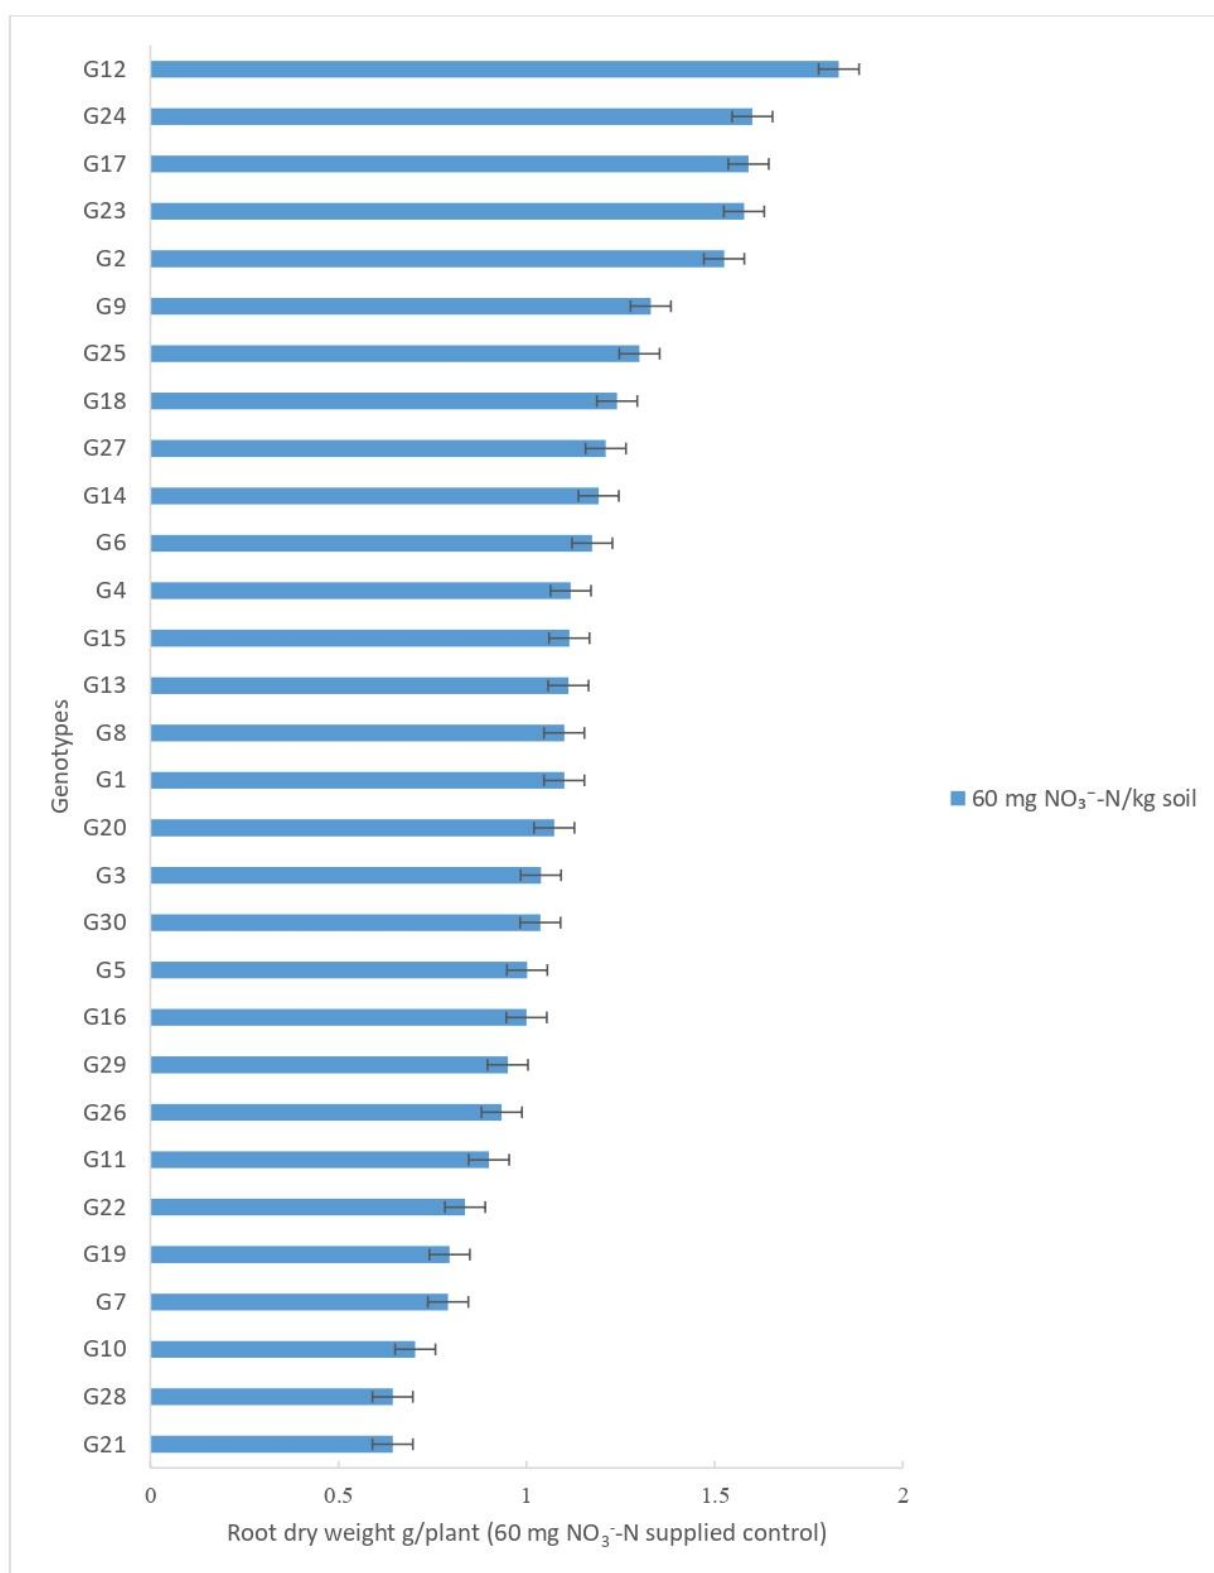

Figure S2. Effect of the control 60 mg NO<sub>3</sub><sup>-</sup>-N/kg soil on root dry weight of canola genotypes. Error bars represent ±SE (n=3).

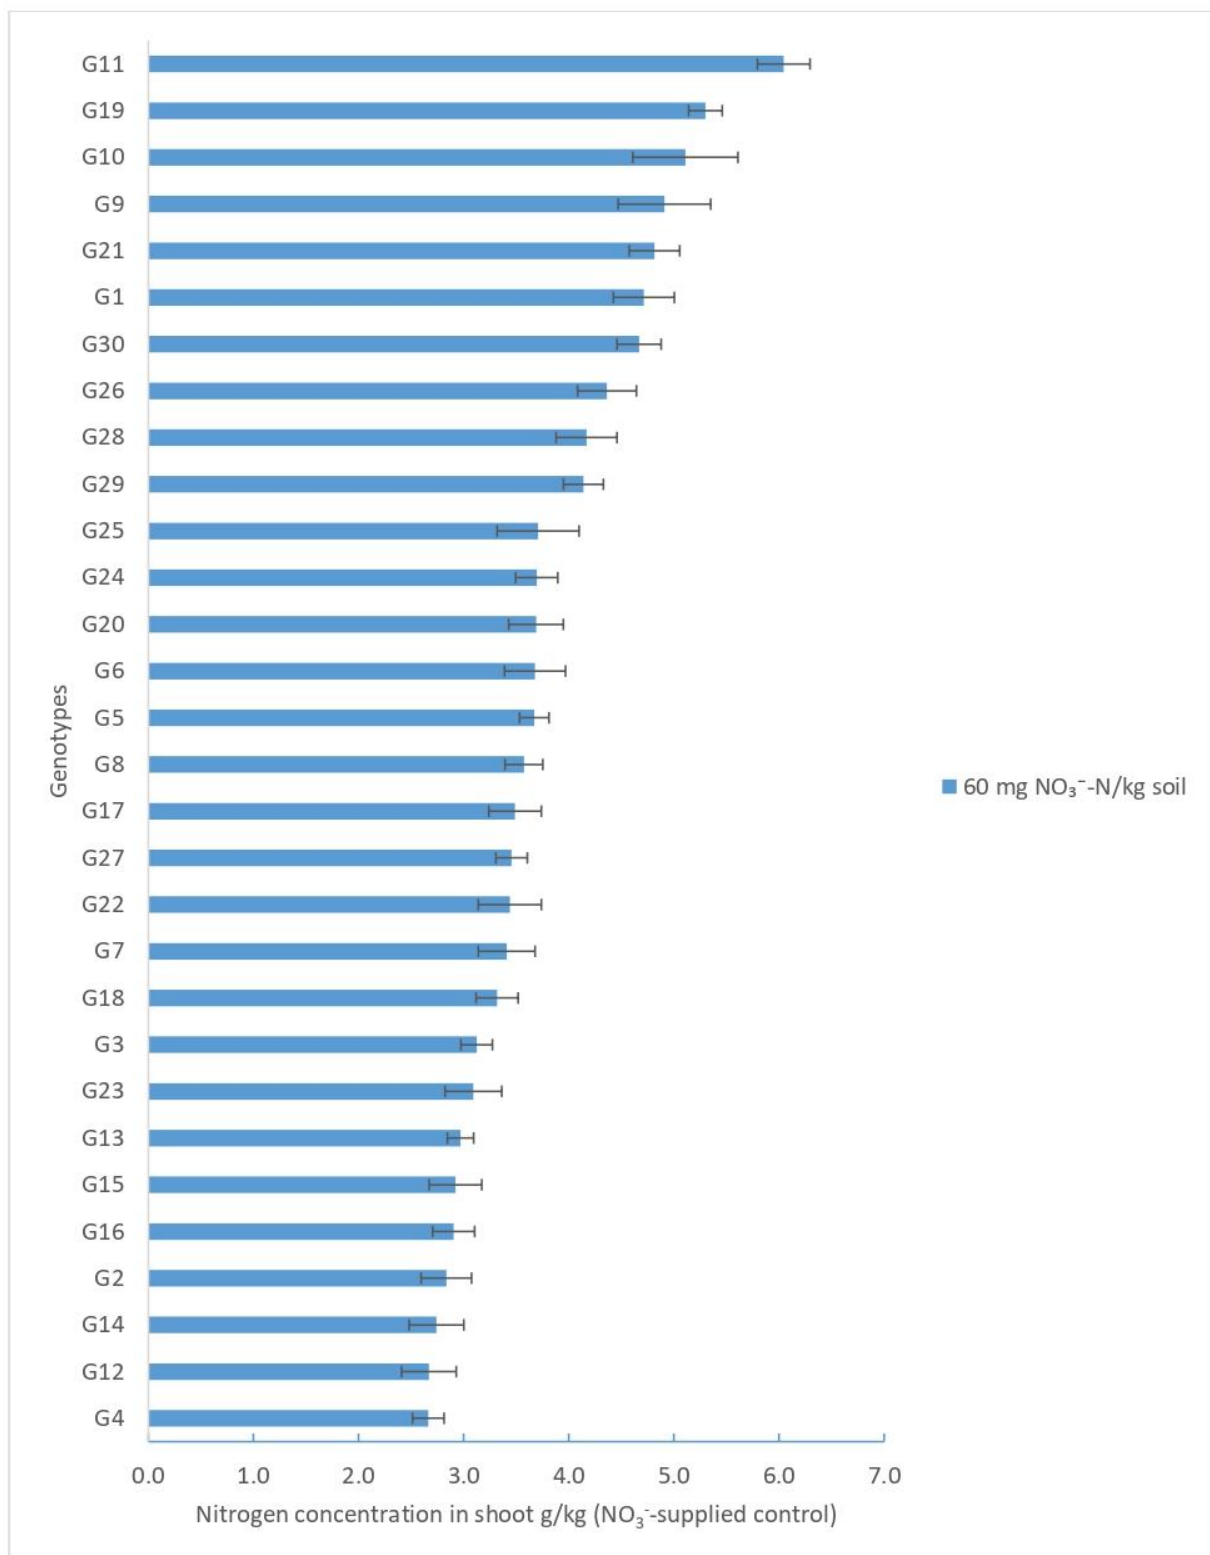

Figure S3. Effect of the control 60 mg NO<sub>3</sub><sup>-</sup>-N/kg soil on nitrogen concentration in shoot of canola genotypes. Error bars represent ±SE (n=3).
